# Supplementary material for: Allele-Specific Regulation of the Candidate Autism Liability Gene RAI1 by the Enhancer Variant rs4925102 (C/G)
Source: MDPI journal article supplement (doi:10.3390/genes15040460), 2024-04-06
Supplement: s1 [file s1]

Supplementary Materials for

**Allele-specific Regulation of the Candidate Autism Liability Gene *RAI1* by the Enhancer Variant rs4925102 (C/G)**

**Xi Yuan<sup>1</sup>, Li Chen<sup>2,\*</sup> and David Saffen<sup>1,2,3,\*</sup>**

<sup>1</sup> Institutes of Brain Science, Fudan University, Shanghai 200032, China; xyuan9209@163.com

<sup>2</sup> Department of Cellular and Genetic Medicine, School of Basic Medical Sciences, Fudan University, Shanghai 200032, China;

<sup>3</sup> State Key Laboratory of Medical Neurobiology, Fudan University, Shanghai 200032, China;

\* Correspondence: chenli2008@fudan.edu.cn (L.C.); saffen@fudan.edu.cn or david.saffen2@gmail.com (D.S.)

**This PDF file includes:**

Figs. S1 to S5

Tables S1 to S2

Appendix

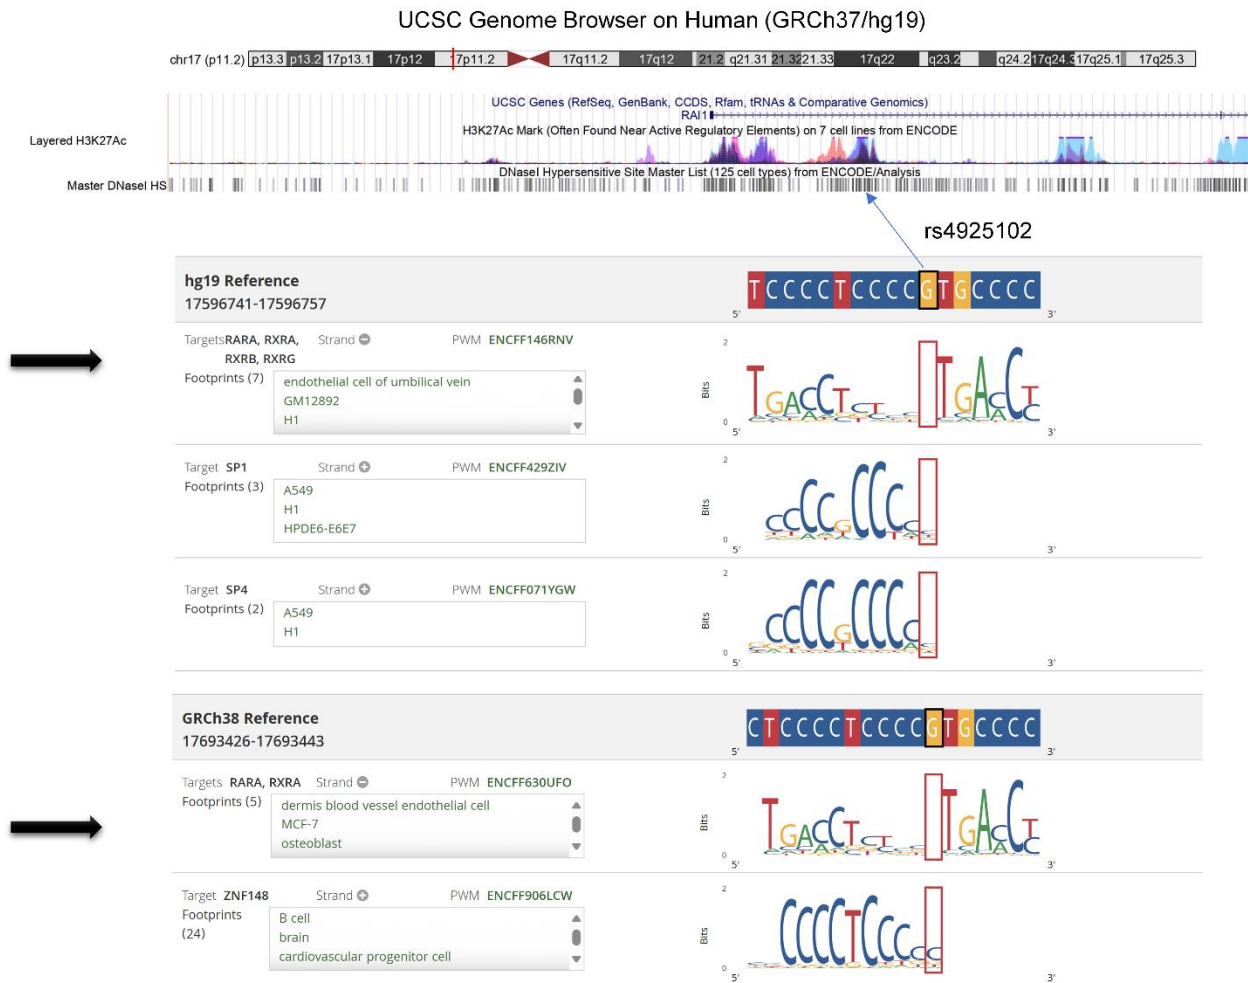

**Figure S1.** Location and chromosomal context of the regulatory variant rs4925102 in human *RAI1* intron 1. **(top)** Screen shot from the UCSC Genome Browser for the indicated region of Chromosome 17 showing the positions of the *RAI1* gene and histone III lysine 27 acetylation- and DNase sensitive-clusters. **(bottom)** Screen shots from RegulomeDB database (<http://www.regulomedb.org/>) based on hg19 and GRCh38 versions of the reference genome showing the locations of SNP rs4925102, RARα/RXRα, SP1, SP4, and ZNF148 consensus binding sequences and DNA sequences protected by the listed transcription factors in DNase footprint assays.

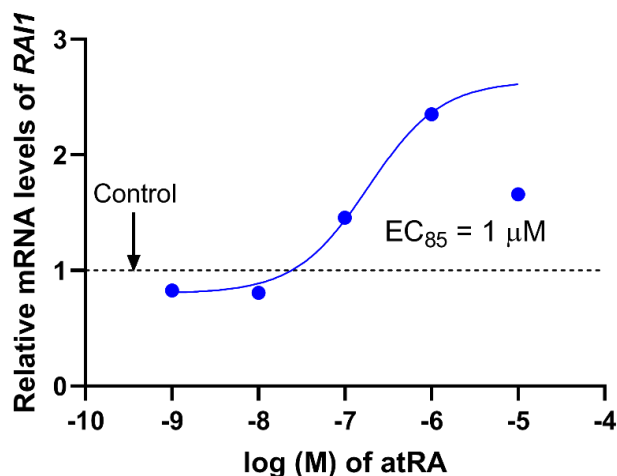

**Figure S2.** All-*trans* retinoic acid (atRA) increases *RAI1* mRNA expression in the human neuroblastoma cell line SH-SY5Y in dose-dependent manner. SH-SY5Y cells were exposed to increasing concentrations (1 nM, 10 nM, 100 nM, 1  $\mu$ M, and 10  $\mu$ M) of atRA or 0.01% dimethylsulfoxide (DMSO) carrier solvent alone (control) for 24 hrs. The measured *RAI1* mRNA levels were normalized to measured level of the house-keeping gene *GAPDH* mRNA in each sample. Relative mRNA levels of *RAI1* are listed as fold-increase compared to the level measured in control SH-SY5Y cells exposed to DMSO alone. Nonlinear regression analysis was carried out using GraphPad Prism (v9.0), which predicted an effective concentration of  $EC_{85}$  for  $\sim 1$   $\mu$ M RA.

**Methods:** Total RNA was isolated using TRIzol reagent (Invitrogen, Carlsbad, MA, USA). Reverse transcription was performed using the PrimeScript™ II 1<sup>st</sup> Strand cDNA Synthesis kit (TaKaRa, Tokyo, Japan). The level of target mRNA was normalized to the level of *GAPDH*. Real-time quantitative PCR was performed using SYBR® Green Realtime PCR Master Mix (TOYOBO, Kita-ku, Osaka, Japan). The PCR primer sequences are as follows, *RAI1*: 5'-AGACCCAGGAGGAGCCC-3' (forward), 5'-TGCGAGGTCTGCTGGTAGTT-3' (reverse); *GAPDH*: 5'-TCAAGATCATCAGCAATGCC-3' (forward), 5'-TGTGGTCATGAGTCCTTCCA-3' (reverse).

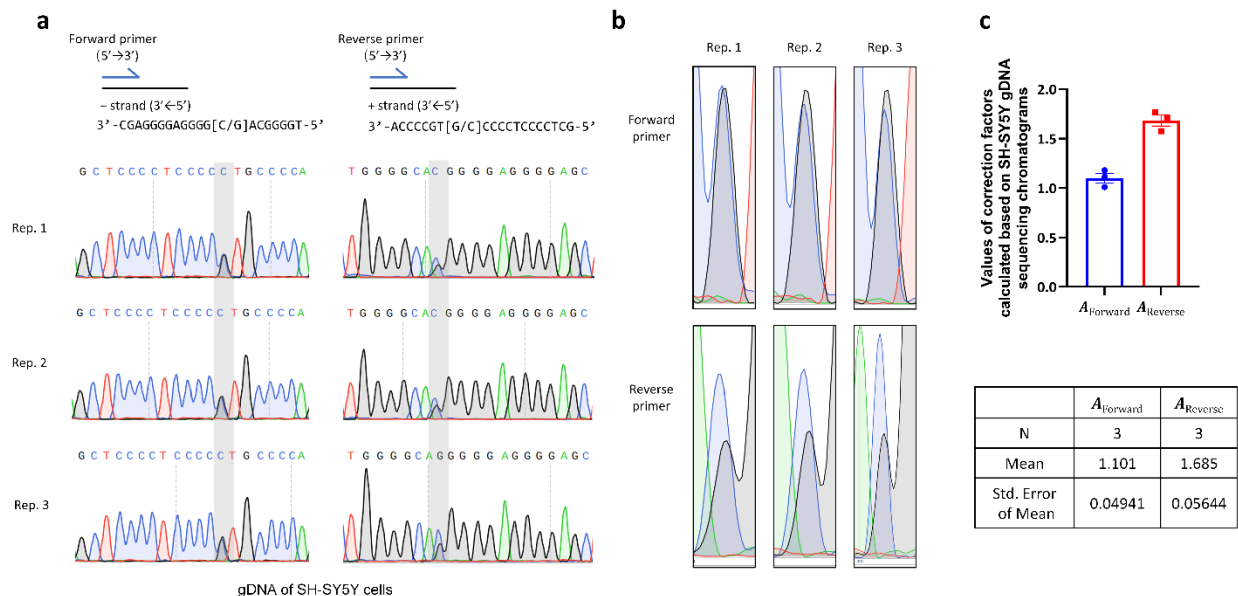

**Figure S3.** Calculation of  $A_{\text{forward}}$  and  $A_{\text{reverse}}$  correction factors based on Sanger sequencing of SH-SY5Y genome DNA. To normalize ratios of peak areas for rs4925102 C- and G-alleles in Sanger sequencing electropherograms obtained using immunoprecipitated DNA of unknown allelic composition, intrinsic differences in C- and G-allele-related fluorescence signals were quantified using DNA extracted from SH-SY5Y cells, which are heterozygous for rs4925102(C/G). **(a)** Sanger sequencing electropherograms obtained for SH-SY5Y genomic DNA (gDNA) using forward or reverse sequencing primers described in the Methods section of the main text. **(b)** Enlarged screenshots of overlapping rs4925102-C and -G peaks in the electropherograms shown in panel (a). **(c)** Values of  $A_{\text{Forward}}$  and  $A_{\text{Reverse}}$  correction factors calculated based on three independent experiments and listed as mean  $\pm$  its standard error (SEM).

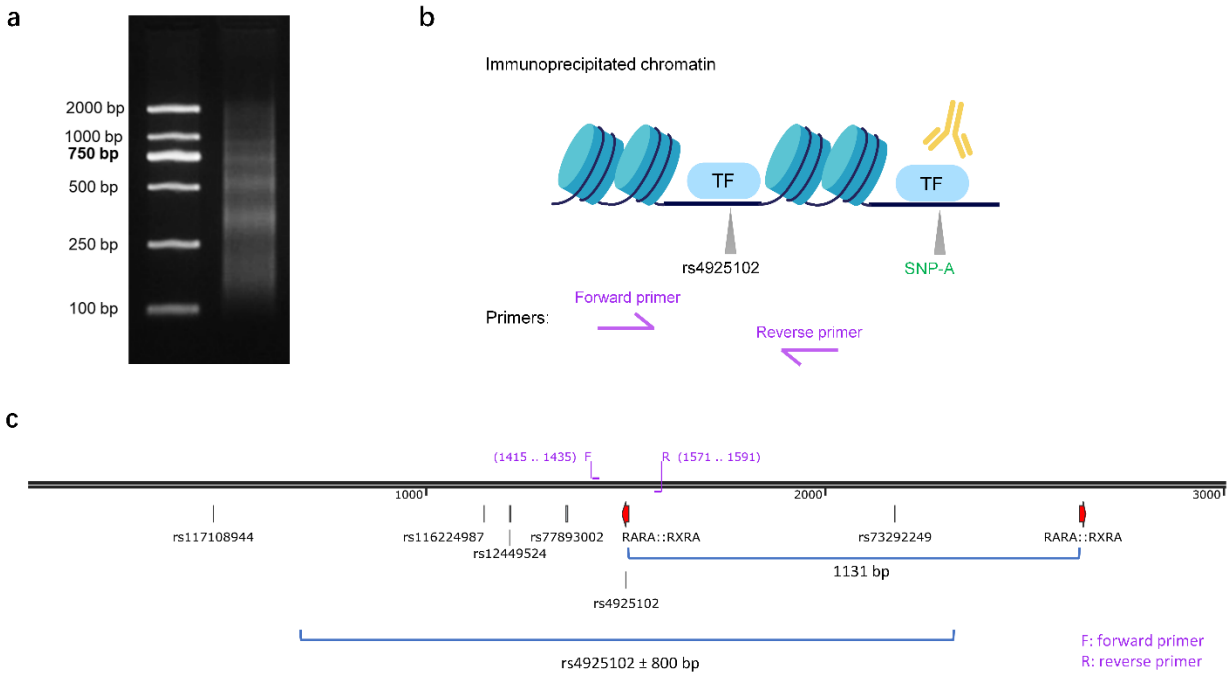

**Figure S4.** Chromatin immunoprecipitation (ChIP) experiments using SH-SY5Y cells provide evidence for the binding of RAR $\alpha$ /RXR $\alpha$  to chromosomal fragments containing SNP rs4925102. **(a)** Agarose gel electrophoresis of DNA purified from sonicated chromatin, revealed DNA fragments ranging in size from ~300 to ~1000 bp. Similar results were obtained in replication experiments (*not shown*). **(b)** A schematic diagram showing how false-positive signal could be produced by a nearby TF binding site that contains a SNP- A that is in linkage disequilibrium (LD) with rs4925102. If the genotype of SNP-A influences the binding of TFs (e.g., RAR $\alpha$ /RXR $\alpha$ ) with which it interacts, the binding-favorable-genotype of SNP-A as well as the genotype of rs4925102 that is in LD with SNP-A would be enriched in the immunoprecipitated chromatin. **(c)** Locations of RAR $\alpha$ /RXR $\alpha$  binding sites (RARA::RXRA) predicted using JASPAR online tool ([jaspar.elixir.no](http://jaspar.elixir.no)) within a chromosomal segment spanning rs4925102  $\pm$  1500 bp. Predicted binding threshold for the RAR $\alpha$ /RXR $\alpha$  dimer (red) was 80%. Also shown are the locations of common SNPs and forward (F) and reverse (R) PCR primers used to detect DNA segments that include rs4925102 (purple). DNA fragments containing both the rs4925102 and the upstream or downstream RARA::RXRA sites are unlikely to significantly contribute to the intensity of the stained PCR-amplified DNA fragments centered on the rs4925102 SNP in the ChIP experiments, as DNA fragments over 1 kb only make up a small fraction of the chromatin used for immunoprecipitation (based on the gel shown in panel (a)).

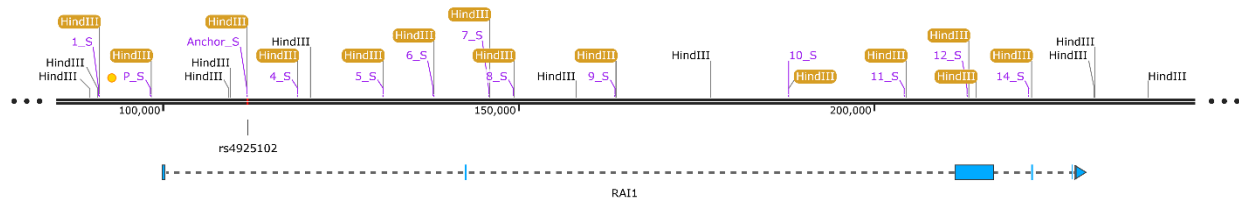

**Figure S5.** *Hind* III recognition sites within the human *RAI1* locus. The *Hind* III recognition sites marked with orange backgrounds were included in the control template for 3C-qPCR. Primers represented in purple font are the forward primers of primer pairs used to amplify PCR products covering each targeted *Hind* III recognition site. Constructions prepared with these PCR products were pooled in equal molar amounts and digested with *Hind* III followed by ligation to form the control template used in 3C-qPCR detections.

**Table S1. Primers used in plasmid constructions.**

| Oligo Name | Allele | Sense or Anti-sense | Sequence (5'-3')*                                                   |
|------------|--------|---------------------|---------------------------------------------------------------------|
| C-rs49-S   | C      | Sense               | <b>TCGAG</b> CCTCTCCAGCTCCCCTCCCC <u>C</u> TGCCCCAGGCATCTTT         |
| C-rs49-A   | C      | Anti-sense          | <b>AGCT</b> AAAGATGCCTGGGGCA <u>G</u> GGGGAGGGGAGCTGGAGAGG <b>C</b> |
| G-rs49-S   | G      | Sense               | <b>TCGAG</b> CCTCTCCAGCTCCCCTCCCC <u>G</u> TGCCCCAGGCATCTTT         |
| G-rs49-A   | G      | Anti-sense          | <b>AGCT</b> AAAGATGCCTGGGGCA <u>C</u> GGGGAGGGGAGCTGGAGAGG <b>C</b> |

\*Underlined bases indicate SNP alleles and sequences in **BOLD** type indicate restriction endonuclease recognition sites.

**Table S2. Primers used in chromatin conformation capture (3C) assays.**

| Primers              | Sequences (5'-3')       |
|----------------------|-------------------------|
| <i>RAI1</i> _exon3_S | ATAACCAGCCCGAGTCATGCA   |
| <i>RAI1</i> _exon3_A | TGATGTTTCCTGCGAGGTCTG   |
| 1_S                  | TTGGGTGTGACTGATATTCTCCG |
| 1_A                  | AACTTTCCCACAATTAGAGC    |
| P_S                  | TGTCATCCAGAAACCGCACT    |
| P_A                  | GTCTCCCAGGGTGAATGTCAA   |
| Anchor-S             | GGGCAGCCTTCCTGATTGAC    |
| Anchor-A             | CGCAGCATCTTAGAATGTAGG   |
| 4_S                  | CATCAAAGCGTCTTCTCGTT    |
| 4_A                  | GGGCGTCGTTTTCCAGGTAA    |
| 5_S                  | AGGTCAAATGGCATAGGAGA    |
| 5_A                  | CCCACTCAGCCATTACAACA    |
| 6_S                  | TTCCATAGCACGCTTCACCTA   |
| 6_A                  | AAGGTGGCAAAAGTATGCATC   |
| 7_S                  | GACCCAGCTACTGATTTGCC    |
| 7_A                  | TCCCGTGAACACACCCAGTCG   |
| 8_S                  | CGAGGCACAAGATGAGACTT    |
| 8_A                  | ACACCCACAGAAGAGTGACA    |



---

|      |                        |
|------|------------------------|
| 9_S  | GCCTGTAAAGTGATGATGGAA  |
| 9_A  | CCCTTTCCTTAGAATATGCTC  |
| 10_S | CGTCATAATGAAGGAGCGACA  |
| 10_A | TACCCACCAGAAATTCCATGC  |
| 11_S | GATCCCCTTTGCATCGGTTT   |
| 11_A | ATCCTGCTCCCAAATAAAGTGG |
| 12_S | ACATGTCCACCAAATCTGACGA |
| 12_A | GTGGCTTGCTGCTGTCCTTG   |
| 13_S | TGGCCCAGAAGCCCAACAAGC  |
| 13_A | CCGTGAGAGAACGAGTACACAT |
| 14_S | TGTGTACCCCAGTGCTGAAC   |
| 14_A | AGGTGTGGAGGCATCCTTTG   |

---

## Appendix:

### Notes:

The genotypes of five additional SNPs within this region in SH-SY5Y chromosomal DNA are as follows: rs117108944 (-1036, A/A), rs116249987 (-355, A/A), rs12449524 (-290, A/C), rs77893002 (-150, AGGC/AGGC), rs73292249 (+675, C/C). In addition, no indel/duplication or deletion mutations were detected in this region. The haplotypes of rs12449524 and rs4925102 are AG/CC.

6 common variants were highlighted with different colors as rs117108944, rs116249987, rs12449524, rs77893002, rs4925102, and rs73292249.

>Selected DNA sequencing results of genotype of SH-SY5Y with rs4925102 (G)

hg19\_dna range=chr17:17595022-17597816 5'pad=0 3'pad=0 strand=+

```
AGGCAAAAGAGAGGACTAAACCCTTTAGTCTGTTTGAGGGAAGTCCAGCC
CCCAGCATGTTGCTCTCTGGGGGATCCAGCAGGGCCAGGTGGGCAGTGGG
AGCACCCCTAGCCCCAGGTGCTACCTTCCAGCCTGGGGCCAAGCCTTTTCC
CTTTCTCTCATTTCAGCTTTCTGATAGGTGGGAAAGAGAAGCAGGAAAA
AAGAGCAGAGGAAAAACAATATTTTCATTTCAAACACAGATAGGGGTGAG
GGAGGCGGGAAGTAATCTGGTTTATGATACCTTTGAGACAAGCACAGAAA
ATCCCCACCGTGGCCCCGAAATAGCACTAAAACAGACGTTTTGCCAAATCA
GACTTAATTGAGTGGCTCTCTTCTTGACTCCAGCAGGATGTGGCTGGAGC
TGGCTTTGTTCCCTTGGGGTGACACTGTCCCCTGGGGCCCCTGCCCTGGC
TAATTAACAAAGAGGACCTGGTCTCCTAGGCAGGACAGGAGCCTGGGGA
GCTGAACCTGACAGCCCTTGGCCTCTGCCTGAGAGGGCCAGAAATGGTTA
CAGGGGTTGGGAAGGTGGGGGGTTCCTGACAGGAGGGCCAAGTGAAGTAA
AGCATTGGTGGGAGAGGCCTGGTTCCTCTAATATGTGAATATCTGTCTCT
TTGGATGCTGAAAGGGATGGAGAAAAGCCAGCATTGAGTGCCTACTATTG
TGCCAGGCATTGGGTGGTCTCGCTAAGTCTTATTAAGTGCCTATATCC
ATTATCAAGGAACTGAAGCACAGAGAGGTTAAGTGATCTGCCTGAGGTC
ACACAGCAACCAAGTGGCAGAGCTAGGATTAGAAATCACATCCGCAGGCT
CCAAAGCCAGGCCCTGCCTGCTGCTTACCCCTTCCCCATGTTAGTCACT
CATCCATTGCGGAGCTAATTCCTGGCTATGAAATAATATTGTGACCTTGT
GGGAAGTGAAGGCTTGCAAGTCAGACAGCCATGAGCTTGGCTTCTGACCAA
AGCAGTTTTTCTTTTCATGGTTTTCTCCCTCAGAACCTCCTCTTTCTCA
TCTATCAAGTGGGCATAATCATGCCTTTATCCTGGAGTTGCTGTAAGGGT
TAAATTCAGCACAGAAAGGGATGGAAGGGGAAGGAGGAGGTCCTTGGGCC
ACCCAGCTTGGCAGGGTGCAATAAAAGAGTCCTAGGTAGAGGGAGCCAGG
CAAGATTGCAATATCTCTGTGCCTATCAGTGTTGGGTTTCTTTATTTGAA
AGGGGAGAGAGGGCAGACTCCACTCTGCAGGTAGAGAAGGTGGTGTGAA
TGCGGGTATTTATTTTCTTTGCCTGTGAAAGCCCTGTTTTCGCTCAGGC
```

TGTGTAGGGCTTCCCGACACTGCCATGGGTGCGCACATCTGCACACTCTG  
GGGTGCCTGCCATGCAGAGGCATCTGCCCAGGGTGGGCAATGAGGGCATC  
CACCATGTGACGCCCCCGTGCAGCCTGTAAGCTCTCATCACAGTGCCTGG  
GATACCTGGGAGTCCCCAGAAAGAGTGAGGATGGGTGAGGGCCATGAAAC  
CAGGGCATCATTCTCCACCTCCTCTGATCAGGCCCTCCTGGTCCCATT  
ATCTCCTTATCTCCTGGCAGCCAGTGGGTTGCTGGGAAGGCAGGGGCAGC  
CTTCCTGATTGACAAACAAAACAAGCTTGATCACAAAAGGAGAGGGGAGA  
CTGGCTGGGCCTCTCCAGCTCCCCCTCCCGTGCCCCAGGCATCTTTCTTG  
CTCCACCCAACTGGCACCTACATTCTAAGATGCTGCGAGGGGGCTCCAA  
AGCCATTGTGCAAGGTGAGGCCACCCAGGCTAGGAGCCCCTTGCACTGGG  
GAGGTGGATTCAAGGAGTGATGGGGTTGCCATGAGGCGGCGCTTGCTGCA  
ATGGCCGCCCCTCCTTCCCTTCAGCTGGCTGGGCAGGCAGCTTGAGAGG  
AAGCCAGGCGGCAGGTAGCTGAGAAAGACATCGGATCCAGGGGGAGCAGC  
AGAGAAAGCAAACAAACAGGGCTTTGTGTGGCTGCAGATTGGCGGCTCAG  
AAGGAAGCCAGGCCTGTGGTAGGGGAAGGGAGAGGAAGGAACGGGAGA  
CCAGGCCATTGCTCTGGGCCAGAGATCGGCGGCTGGACCAGCCCGGGCTG  
GGCGGCCGGAAGTAGCGAGTGCCACTACGTGTGGACAGGCATCTGGAGT  
CACAGCCTGGCCGAGTCCCAGCTCTGCCACTTCACTCCTTAACAGATCTG  
GGCTTGTTTGCCACCTAATCTGGGCAGTCATTACACGTAGGACTCGCT  
GGCTTAGGAGGAGAGTCACCTGTCCTGGCCCAGTCAGTGTCTGCTCTCAT  
CCTACCCTTGTCCTGTCATTGCTGGCAGGACACAGAATCAAAGGGATTCA  
GGGTCTCCTGGGAGCTGCTAGCCTTGCCGGGTCTCCTGGGAGGGCAGCGA  
CTTCTGCTTAGATCTGTGGGCACTTTGGAGTCTTTGACCGGGGAGGCAGC  
CGTGCTGAGGGGAAACGGGTTCTCTGCCCAATAACGGATGCCTGGGGTGT  
AGGTGGGCAGAGGCTGGCATCAGGCCTGAGGAACCAAACCTGCCCCCTCCT  
CGTCGCGGTGGAGACGCACGAGGTGCGGGGAGGAACATAGCCAGGAAGAC  
GGGCCTTCCTGTGGGGAGGGAGGGGCATCTTTTCTGGGGTGTGAGTCACA  
TTCTGGATCCCAGCGAGGGCAGCCCCAACCTGGCCCACCTCTCAGAGGG  
CTGGGAGGGCCCGGGCCTCGAGGAAAGGCATAGGTAGGAGCTGTC

>Selected DNA sequencing results of genotype of SH-SY5Y with rs4925102 (C)  
hg19\_dna range=chr17:17595022-17597816 5'pad=0 3'pad=0 strand=+

AGGCAAAAGAGAGGACTAAACCCTTTAGTCTGTTTGAGGGAAGTCCAGCC  
CCCAGCATGTTGCTCTCTGGGGATCCAGCAGGGCCAGGTGGGCAGTGGG  
AGCACCTAGCCCCAGGTGCTACCTTCCAGCCTGGGGCCAAGCCTTTTCC  
CTTTCTCTCATTTGCAGCTTTCTGATAGGTGGGAAAGAGAAGCAGGAAAA  
AAGAGCAGAGGAAAAACAATATTTTCATTTCAAACACAGATAGGGGTGAG  
GGAGGCGGGAAGTAATCTGGTTTATGATACCTTTGAGACAAGCACAGAAA  
ATCCCCACCGTGGCCCCGAAATAGCACTAAAACAGACGTTTTGCCAAATCA  
GACTTAATTGAGTGGCTCTCTTCTTGACTCCAGCAGGATGTGGCTGGAGC  
TGGCTTTGTTCCCTTGGGGTGACACTGTCCCCTGGGGCCCCTGCCCTGGC  
TAATTAACAAAGAGGACCTGGTCTCCTAGGCAGGACAGGAGCCTGGGGA  
GCTGAAGTTGACAGCCCTTGGCCTCTGCCTGAGAGGGCCAGAAATGGTTA  
CAGGGGTTGGGAAGGTGGGGGTTCTTGACAGGAGGGCCAACTGAGTGAA  
AGCATTGGTGGGAGAGGCCTGGTTCCTCTAATATGTGAATATCTGTCTCT  
TTGGATGCTGAAAGGGATGGAGAAAAGCCAGCATTGAGTGCCTA<sup>A</sup>CTATTG  
TGCCAGGCATTGGGTGGTCTCGCTAAGTCTTATTAAGTGCCTATATCC  
ATTATCAAGGAACTGAAGCACAGAGAGGTTAAGTGATCTGCCTGAGGTC  
ACACAGCAACCAAGTGGCAGAGCTAGGATTAGAAATCACATCCGCAGGCT  
CCAAAGCCAGGCCCTGCCTGCTGCTTACCCCTTCCCCATGTTAGTCACT  
CATCCATTGCGGAGCTAATTCCTGGCTATGAAATAATATTGTGACCTTGT  
GGGAAGTGAAGGCTTGCAGTCAGACAGCCATGAGCTTGGCTTCTGACCAA  
AGCAGTTTTTCTTTTCATGGTTTTCTCCCTCAGAACCTCCTCTTTCTCTCA  
TCTATCAAGTGGGCATAATCATGCCTTTATCCTGGAGTTGCTGTAAGGGT  
TAAATTCAGCACAGAAAGGGATGGAAGGGGAAGGAGGAGGTCCTTGGGCC  
ACCCAGCTTGGCAGGGTGCAATAAAAGAGTCCTAGGTAGAGGGAGCCAGG  
CAAGATTGCAATATCTCTGTGCCTATCAGTGTTGGGTTTCTTTATTTGAA  
AGGGGAGAGAGGGCAGACTCCACTCTGCAGGTAGAGAAGGTGGTGTGGAA  
TGCGGGTATTTATTTTCTTTGCCTGTGAAAGCCCTGTTTTCGCTCAGGC  
TGTGTAGGGCTTCCCGACACTGCC<sup>A</sup>TGGGTGCGCACATCTGCACACTCTG  
GGGTGCCTGCCATGCAGAGGCATCTGCCAGGGTGGGC<sup>A</sup>CTGAGGGCATC  
CACCATGTGACGCCCCCGTGCAGCCTGTAAGCTCTCATCACAGTGCCTGG  
GATACCTGGGAGTCCCCAGAAAGAGTGAGGATGGGTGAGGGCCATGAAAC  
CAGGGCATCATTCCTCCACCTCCTCTGATC<sup>AGGC</sup>CCTCCTGGTCCCATT  
ATCTCCTTATCTCCTGGCAGCCAGTGGGTGCTGGGAAGGCAGGGGCAGC  
CTTCCTGATTGACAAACAAAACAAGCTTGATCACAAAAGGAGAGGGGAGA  
CTGGCTGGGCCTCTCCAGCTCCCCTCCCC<sup>C</sup>TGCCCCAGGCATCTTTCTTG  
CTCCACCCAACTGGCACCTACATTCTAAGATGCTGCGAGGGGGCTCCAA  
AGCCATTGTGAAGGTCAGGCCACCCAGGCTAGGAGCCCCTTGCACTGGG  
GAGGTGGATTCAAGGAGTGATGGGGTTGCCATGAGGCGGCGCTTGCTGCA  
ATGGCCGCCCTCCTTCCCTTCAGCTGGCTGGGCAGGCAGCTTGAGAGG

AAGCCAGGCGGCAGGTAGCTGAGAAAGACATCGGATCCAGGGGGAGCAGC  
AGAGAAAGCAAACAAACAGGGCTTTGTGTGGCTGCAGATTGGCGGCTCAG  
AAGGGAAGCCAGGCCTGTGGTAGGGGAAGGGAGAGGAAGGAACGGGAGA  
CCAGGCCATTGCTCTGGGCCAGAGATCGGCGGCTGGACCAGCCCGGGCTG  
GGCGGCCGGAAGTAGCGAGTGCCACTACGTGTGGACAGGCATCTGGAGT  
CACAGCCTGGCCGAGTCCCAGCTCTGCCACTTCACTCCTTAACAGATCTG  
GGCTTGTTTGCCACCTAATCTGGGCAGTCATTACACGTAGGACTCGCT  
GGCTTAGGAGGAGAGTCACCTGTCCTGGCCCAGTCAGTGTCTGCTCTCAT  
CCTACCCTTGTCCTGTCATTGCTGGCAGGACACAGAATCAAAGGGATTCA  
GGGTCTCCTGGGAGCTGCTAGCCTTGCCGGGTCTCCTGGGAGGGCAGCGA  
CTTCTGCTTAGATCTGTGGGCACTTTGGAGTCTTTGACCGGGAGGCAGC  
CGTGCTGAGGGGAAACGGGTTCTTGCCCAATAACGGATGCCTGGGGTGT  
AGGTGGGCAGAGGCTGGCATCAGGCCTGAGGAACCAAACCTGCCCCCTCCT  
CGTCGCGGTGGAGACGCACGAGGTGCGGGGAGGAACATAGCCAGGAAGAC  
GGGCCTTCCTGTGGGGAGGGAGGGGCATCTTTTCTGGGGTGTGAGTCACA  
TTCTGGATCCCAGCGAGGGCAGCCCCAACCTGGCCACCTCTCAGAGGG  
CTGGGAGGGCCCCGGCCTCGAGGAAAGGCATAGGTAGGAGCTGTC
